# Supplementary material for: Reconciling carbon‐cycle processes from ecosystem to global scales
Source: PubMed Central journal article supplement (PMC9292898; doi:10.1002/fee.2296), 2021-02-01
Supplement: FEE-19-57-s002.pdf [file FEE-19-57-s002.pdf]

AP Ballantyne *et al.* – Supporting Information

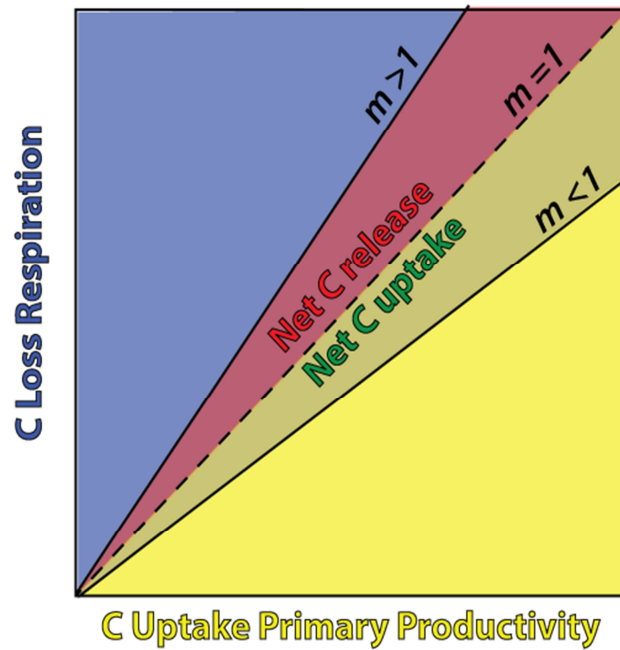

**WebFigure 1.** General conceptual model for net C balance across scales. When ecosystems are in steady state,  $m = 1$ . When photosynthetic gains exceed respiratory losses, net C uptake is observed ( $m < 1$ ), where the integrated green area represents net C uptake. When respiratory losses exceed photosynthetic gains, net C release is observed ( $m > 1$ ). C exchange efficiency (CEE, where  $CEE = \text{net uptake}/\text{gross productivity}$ ) can therefore be approximated as  $1 - m$ .
