# Supplementary material for: Reconciling carbon‐cycle processes from ecosystem to global scales
Source: PubMed Central journal article supplement (PMC9292898; doi:10.1002/fee.2296), 2021-02-01
Supplement: FEE-19-57-s003.pdf [file FEE-19-57-s003.pdf]

**AP Ballantyne *et al.* – Supporting Information**

**WebTable 1. Important carbon-cycle processes and the scales at which they are measured**

| Scale (units)                        | Gross primary production           | Net primary production           | Net exchange                   | Total respiration                   |
|--------------------------------------|------------------------------------|----------------------------------|--------------------------------|-------------------------------------|
| Global (Pg C/year) <sup>a</sup>      | Gross global production (GGP)      | Net global production (NGP)      | Net global exchange (NGE)      | Total global respiration (TGR)      |
| Terrestrial (Pg C/year)              | Gross terrestrial production (GTP) | Net terrestrial production (NTP) | Net terrestrial exchange (NTE) | Total terrestrial respiration (TTR) |
| Biome (Tg C/year) <sup>b</sup>       | Gross biome production (GBP)       | Net biome production (NBP)       | Net biome exchange (NBE)       | Total biome respiration (TBR)       |
| Ecosystem (g C/m <sup>2</sup> /year) | Gross ecosystem production (GEP)   | Net ecosystem production (NEP)   | Net ecosystem exchange (NEE)   | Total ecosystem respiration (TER)   |

**Notes:** proposed revision to terminology describing net and gross carbon (C)-cycle processes at various scales. <sup>a</sup>Pg: petagram (equivalent of 10<sup>15</sup> g of C); <sup>b</sup>Tg: teragram (equivalent of 10<sup>12</sup> g of C).
